# Supplementary material for: Use of Breast Cancer Risk Factors to Identify Risk-Adapted Starting Age of Screening in China
Source: PubMed Central journal article supplement (PMC9650608; doi:10.1001/jamanetworkopen.2022.41441), 2022-11-10
Supplement: jamanetwopen-e2241441-s001.pdf [file jamanetwopen-e2241441-s001.pdf]

## Supplementary Online Content

Zheng Y, Dong X, Li J, et al. Use of breast cancer risk factors to identify risk-adapted starting age of screening in China. *JAMA Netw Open*. 2022;5(11):e2241441. doi:10.1001/jamanetworkopen.2022.41441

**eFigure 1.** Age-Specific 10-Year Cumulative Breast Cancer Risk for Women With 5 Risk Score Levels, Using Age 50 Years for Women in the General Population as a Benchmark

**eFigure 2.** Age-Specific 10-Year Cumulative Breast Cancer Risk for Women With 3 Risk Score Levels in the Development and Validation Data Sets

**eFigure 3.** Age-Specific 10-Year Cumulative Breast Cancer Risk for Women With 3 Risk Score Levels, Using Age 45 Years for Women in the General Population as a Benchmark

**eTable 1.** Association of Risk Factors and Breast Cancer Incidence

**eTable 2.** Incident Age of Breast Cancer in Women With Different Risk Levels

This supplementary material has been provided by the authors to give readers additional information about their work.

**eFigure 1.** Age-Specific 10-Year Cumulative Breast Cancer Risk for Women With 5 Risk Score Levels, Using Age 50 Years for Women in the General Population as a Benchmark

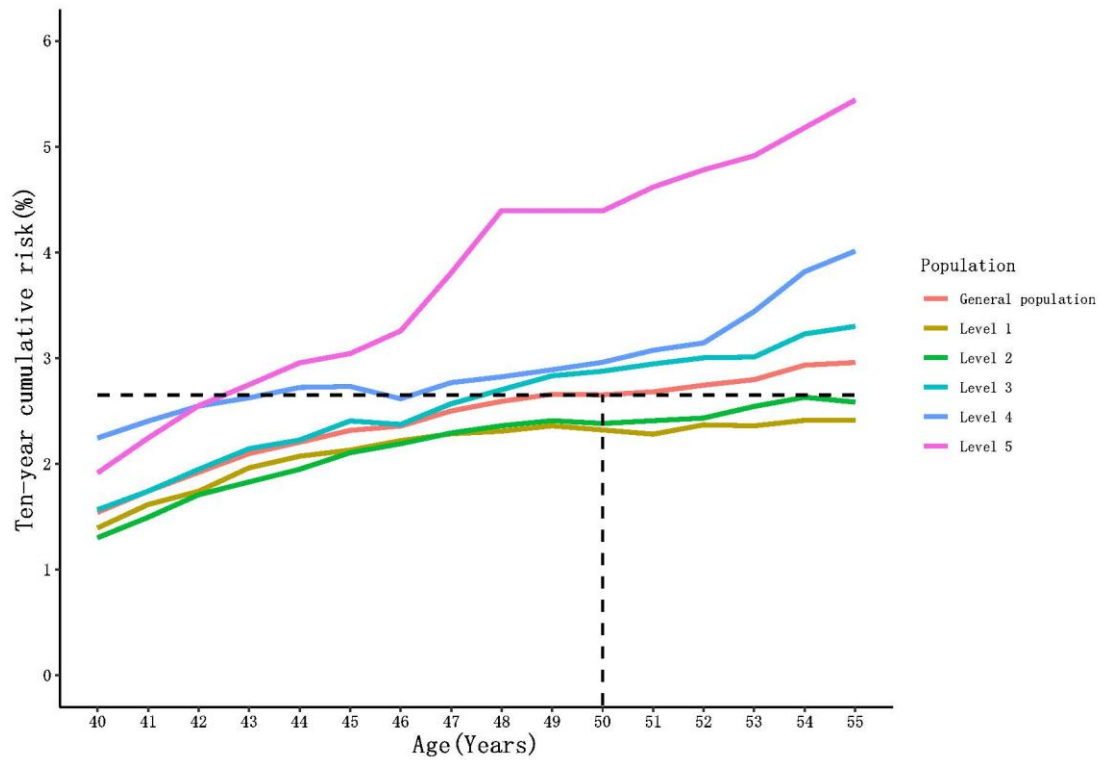

**eFigure 2.** Age-Specific 10-Year Cumulative Breast Cancer Risk for Women With 3 Risk Score Levels in the Development and Validation Data Sets

Solid line: development set; dotted line: validation set.

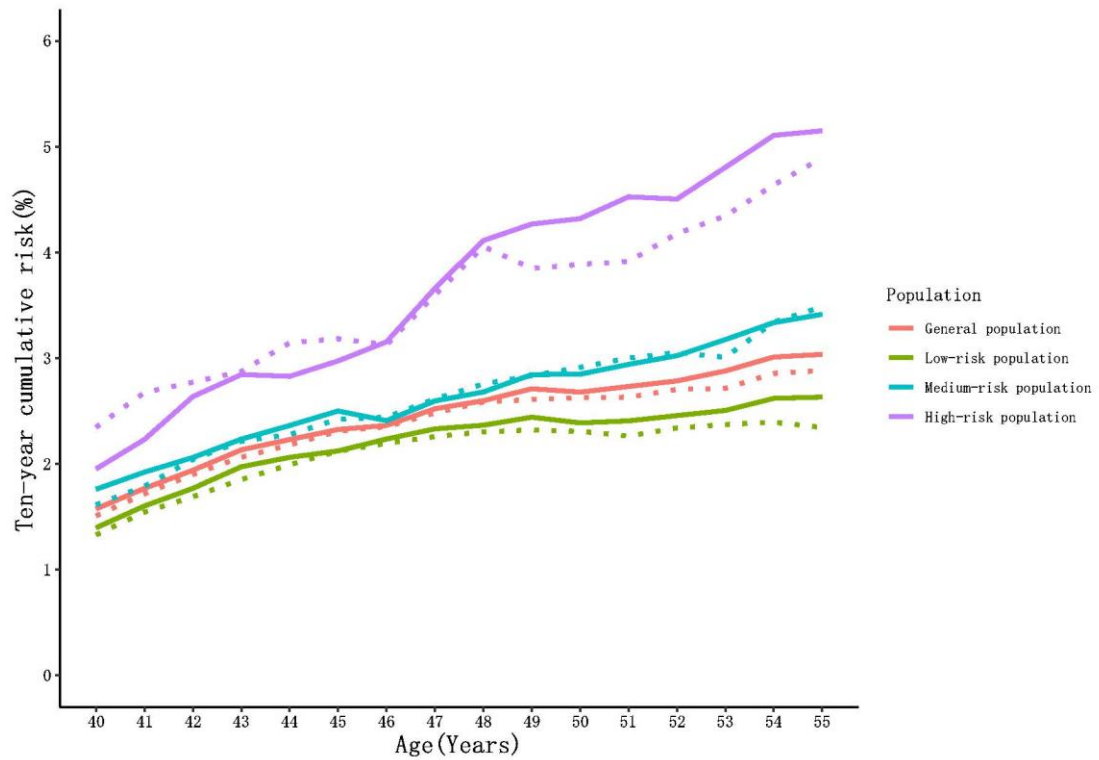

**eFigure 3.** Age-Specific 10-Year Cumulative Breast Cancer Risk for Women With 3 Risk Score Levels, Using Age 45 Years for Women in the General Population as a Benchmark

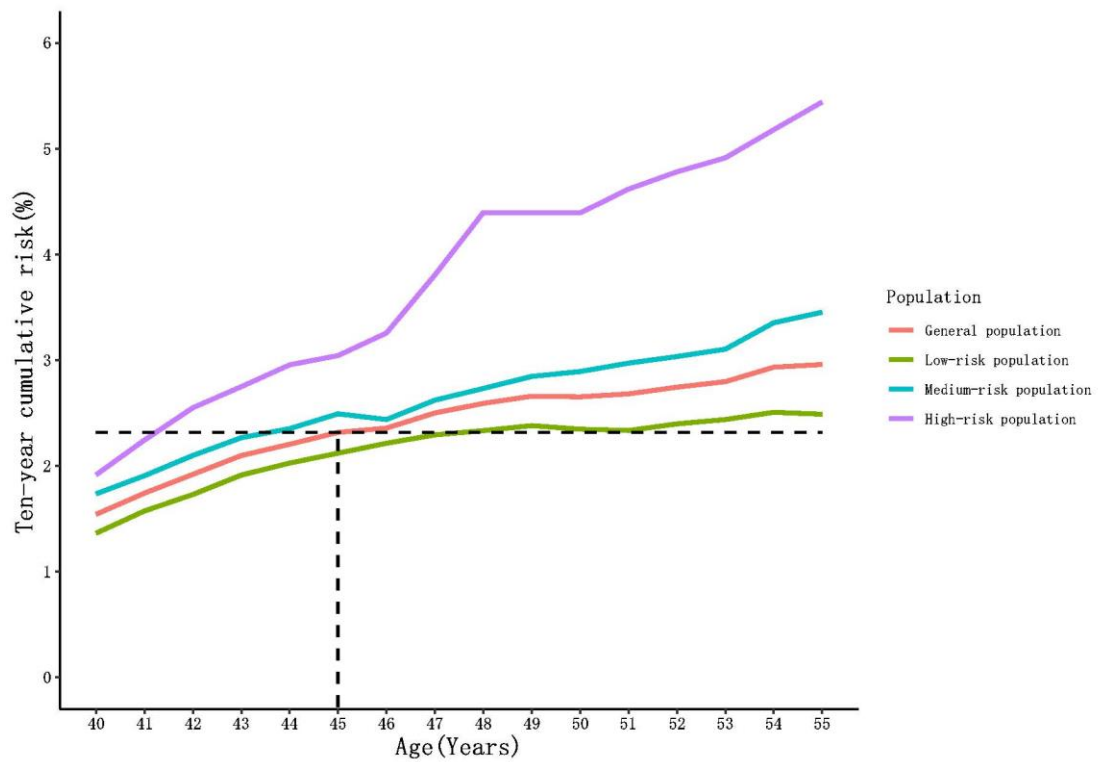

**eTable 1.** Association of Risk Factors and Breast Cancer Incidence

| Variable                                            | MV-adjusted HR (95% CI) <sup>a</sup> | P value |
|-----------------------------------------------------|--------------------------------------|---------|
| <b>First-degree family history of breast cancer</b> |                                      |         |
| No                                                  | 1.00 (reference)                     |         |
| Yes                                                 | 1.16 (1.03-1.31)                     | <.05    |
| <b>Benign breast disease</b>                        |                                      |         |
| No                                                  | 1.00 (reference)                     |         |
| Yes                                                 | 1.25 (1.16-1.35)                     | <.001   |
| <b>Breastfeeding</b>                                |                                      |         |
| No                                                  | 1.00 (reference)                     |         |
| Yes                                                 | 0.78 (0.70-0.87)                     | <.001   |
| <b>Age at menarche, years</b>                       |                                      |         |
| ≥13                                                 | 1.00 (reference)                     |         |
| <13                                                 | 1.27 (1.15-1.40)                     | <.001   |
| <b>BMI</b>                                          |                                      |         |
| <18.5                                               | 0.70 (0.53-0.92)                     | <.05    |
| 18.5-23.9                                           | 1.00 (reference)                     |         |
| 24-27.9                                             | 1.11 (1.04-1.19)                     | <.01    |
| ≥28                                                 | 1.25 (1.12-1.39)                     | <.001   |

BMI: Body mass index.

HR: Hazard ratio.

CI: Confidence interval.

<sup>a</sup> Multivariate Cox regression model.

**eTable 2.** Incident Age of Breast Cancer in Women With Different Risk Levels

| <b>Population</b> | <b>Follow-up period (Median (IQR), y)</b> | <b>Incident age of breast cancer (Mean (SD), y)</b> | <b>P value</b> |
|-------------------|-------------------------------------------|-----------------------------------------------------|----------------|
| General           | 4.47 (3.16-6.35)                          | 58 (8)                                              |                |
| Risk              |                                           |                                                     |                |
| Low               | 4.59 (3.18-6.38)                          | 59 (8)                                              | .07            |
| Medium            | 4.40 (3.14-6.29)                          | 58 (8)                                              | .28            |
| High              | 4.38 (3.12-6.19)                          | 57 (7)                                              | <.001          |

IQR: Interquartile range.

SD: Standard deviation.
